# Supplementary material for: Measurement report: Optical characterization, seasonality, and sources of brown carbon in fine aerosols from Tianjin, North China: year-round observations
Source: Copernicus journal article supplement (doi:10.5194/acp-24-5887-2024), 2024-05-23
Supplement: Supplementary file 1 [file acp-24-5887-2024-supplement.pdf]

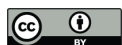

*Supplement of*

**Measurement report: Optical characterization, seasonality, and sources of brown carbon in fine aerosols from Tianjin, North China: year-round observations**

**Zhichao Dong et al.**

*Correspondence to:* Chandra Mouli Pavuluri (cmpavuluri@tju.edu.cn)

The copyright of individual parts of the supplement might differ from the article licence.

**Table S1.** Mass concentrations of WSOC, WIOC and absorbance efficiency of WSBrc and WI-MSBrc (Range & Median) in PM<sub>2.5</sub> from Tianjin, North China.

|                                                      | Annual      |        | Summer      |        | Autumn      |        | Winter      |        | Spring      |        |
|------------------------------------------------------|-------------|--------|-------------|--------|-------------|--------|-------------|--------|-------------|--------|
|                                                      | Range       | Median |
| <b>Concentrations</b>                                |             |        |             |        |             |        |             |        |             |        |
| WSOC ( $\mu\text{g m}^{-3}$ )                        | 0.69–16.0   | 2.56   | 1.14–3.12   | 1.74   | 1.16–7.68   | 3.13   | 1.37–16.0   | 4.19   | 0.69–4.03   | 2.44   |
| WIOC ( $\mu\text{g m}^{-3}$ )                        | 0.00–8.93   | 1.01   | 0.00–1.33   | 0.38   | 0.21–5.07   | 1.39   | 0.00–8.93   | 3.33   | 0.23–2.62   | 0.73   |
| <b>Optical parameters</b>                            |             |        |             |        |             |        |             |        |             |        |
| Abs <sub>365</sub> (Mm <sup>-1</sup> )               | 0.49–36.7   | 2.94   | 0.49–3.16   | 1.23   | 0.55–13.5   | 3.09   | 2.35–36.7   | 8.27   | 0.66–13.3   | 2.94   |
| MAE <sub>365</sub> (m <sup>2</sup> g <sup>-1</sup> ) | 0.38–3.41   | 1.14   | 0.38–1.98   | 0.64   | 0.40–1.76   | 1.02   | 0.90–3.08   | 2.02   | 0.52–3.41   | 1.34   |
| AAE(300–500 nm)                                      | 3.85–7.99   | 5.65   | 3.90–6.88   | 4.90   | 5.12–7.99   | 6.17   | 4.50–7.39   | 5.88   | 3.85–7.57   | 5.27   |
| E <sub>2</sub> /E <sub>3</sub>                       | 3.30–7.66   | 5.18   | 3.64–7.66   | 5.74   | 4.61–7.66   | 5.59   | 4.18–6.22   | 5.15   | 3.30–6.25   | 4.80   |
| FI                                                   | 1.13–1.63   | 1.37   | 1.16–1.49   | 1.32   | 1.36–1.61   | 1.45   | 1.29–1.44   | 1.37   | 1.13–1.63   | 1.37   |
| BIX                                                  | 0.79–1.39   | 1.03   | 0.79–1.04   | 0.91   | 0.83–1.26   | 1.06   | 1.03–1.39   | 1.19   | 0.82–1.24   | 1.00   |
| HIX                                                  | 1.72–4.17   | 2.86   | 2.47–3.98   | 3.00   | 2.11–4.17   | 2.97   | 1.72–3.72   | 2.48   | 1.84–3.76   | 2.87   |
| k <sub>365</sub>                                     | 0.017–0.149 | 0.050  | 0.017–0.086 | 0.028  | 0.018–0.077 | 0.044  | 0.039–0.134 | 0.088  | 0.023–0.149 | 0.058  |
| SFE <sub>Abs300–400</sub> (W g <sup>-1</sup> )       | 0.60–5.13   | 1.74   | 0.60–2.99   | 0.97   | 0.81–5.13   | 1.55   | 1.40–4.76   | 3.14   | 0.62–2.71   | 2.00   |
| SFE <sub>Abs300–700</sub> (W g <sup>-1</sup> )       | 0.98–13.1   | 4.50   | 1.22–10.5   | 2.95   | 1.48–12.5   | 3.30   | 3.75–13.1   | 7.56   | 0.98–6.36   | 4.99   |
| Abs <sub>365</sub> (Mm <sup>-1</sup> )               | 0.32–25.0   | 1.54   | 0.40–1.26   | 0.71   | 0.32–11.0   | 2.08   | 2.85–25.0   | 9.45   | 0.44–11.3   | 1.36   |
| MAE <sub>365</sub> (m <sup>2</sup> g <sup>-1</sup> ) | 0.18–7.05   | 2.26   | 0.89–7.05   | 1.66   | 0.18–4.70   | 1.50   | 2.01–3.42   | 2.71   | 0.42–5.81   | 1.96   |
| AAE(300–500 nm)                                      | 2.08–12.9   | 5.99   | 4.27–9.19   | 5.05   | 2.08–12.9   | 5.72   | 5.49–6.76   | 6.29   | 3.94–8.38   | 6.30   |
| E <sub>2</sub> /E <sub>3</sub>                       | 3.32–24.1   | 6.16   | 4.32–9.58   | 6.58   | 3.32–10.1   | 5.31   | 5.28–7.73   | 6.11   | 4.50–24.1   | 6.96   |
| FI                                                   | 1.29–2.24   | 1.59   | 1.34–1.92   | 1.58   | 1.48–1.73   | 1.57   | 1.61–2.24   | 1.71   | 1.29–1.77   | 1.51   |
| BIX                                                  | 0.83–1.76   | 1.27   | 0.92–1.65   | 1.36   | 0.83–1.36   | 1.05   | 1.20–1.62   | 1.42   | 0.94–1.76   | 1.22   |
| HIX                                                  | 0.11–2.38   | 0.59   | 0.11–0.49   | 0.25   | 0.30–2.38   | 1.34   | 0.62–1.79   | 1.44   | 0.11–1.26   | 0.34   |
| k <sub>365</sub>                                     | 0.0080.307  | 0.098  | 0.039–0.307 | 0.072  | 0.008–0.205 | 0.065  | 0.0870.149  | 0.118  | 0.018–0.253 | 0.087  |
| SFE <sub>Abs300–400</sub> (W g <sup>-1</sup> )       | 0.64–8.84   | 2.89   | 0.60–2.99   | 0.97   | 0.75–7.01   | 2.34   | 3.04–5.29   | 4.15   | 0.64–8.84   | 2.94   |
| SFE <sub>Abs300–700</sub> (W g <sup>-1</sup> )       | 0.92–51.3   | 7.55   | 1.22–10.5   | 2.95   | 0.92–51.3   | 6.47   | 7.06–11.7   | 9.14   | 2.48–21.8   | 6.28   |

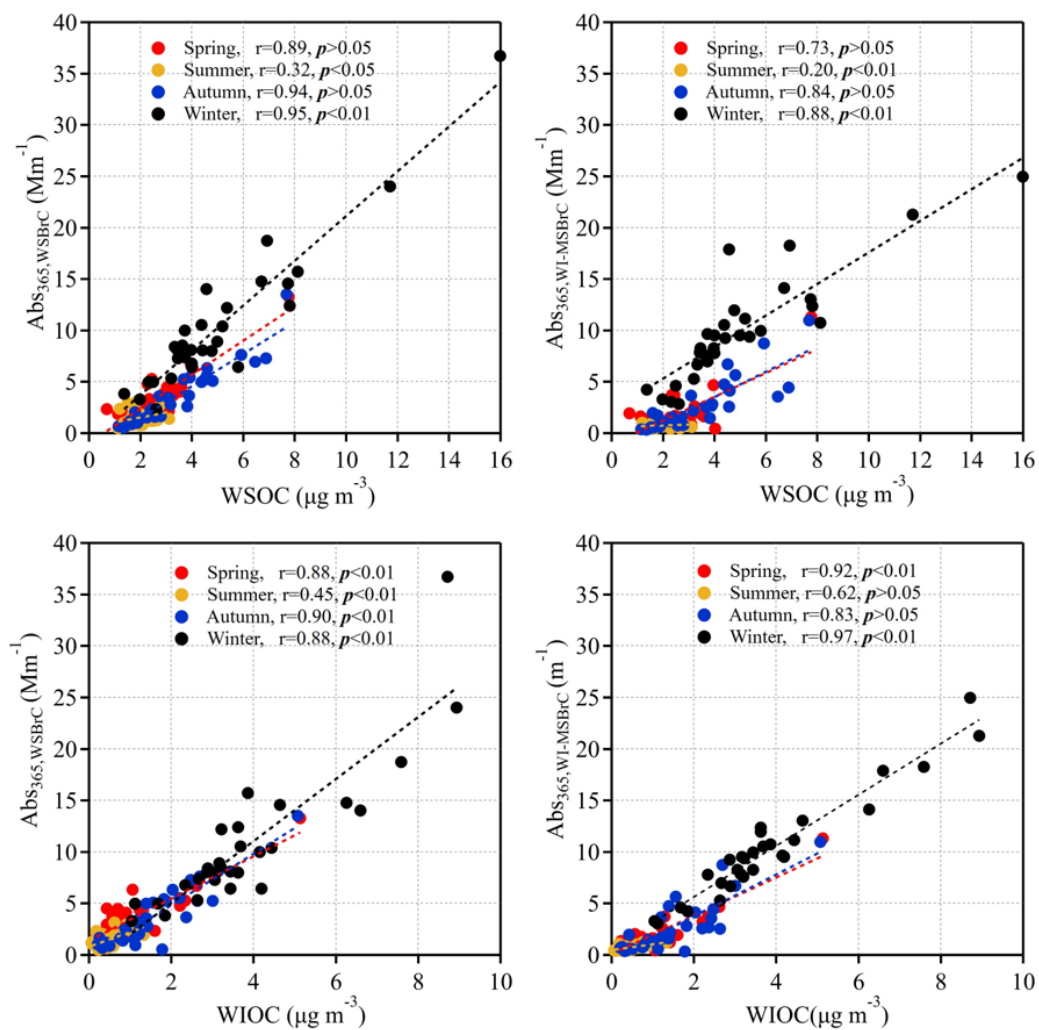

**Figure S1.** Scatter plots of Abs<sub>365</sub>(WSBrC) and Abs<sub>365</sub>(WI-MSBrC) with the concentration of WSOC and WIOC in PM<sub>2.5</sub> from Tianjin in each season during 2018–2019. The WSOC and WIOC data is obtained from (Dong et al., 2021).

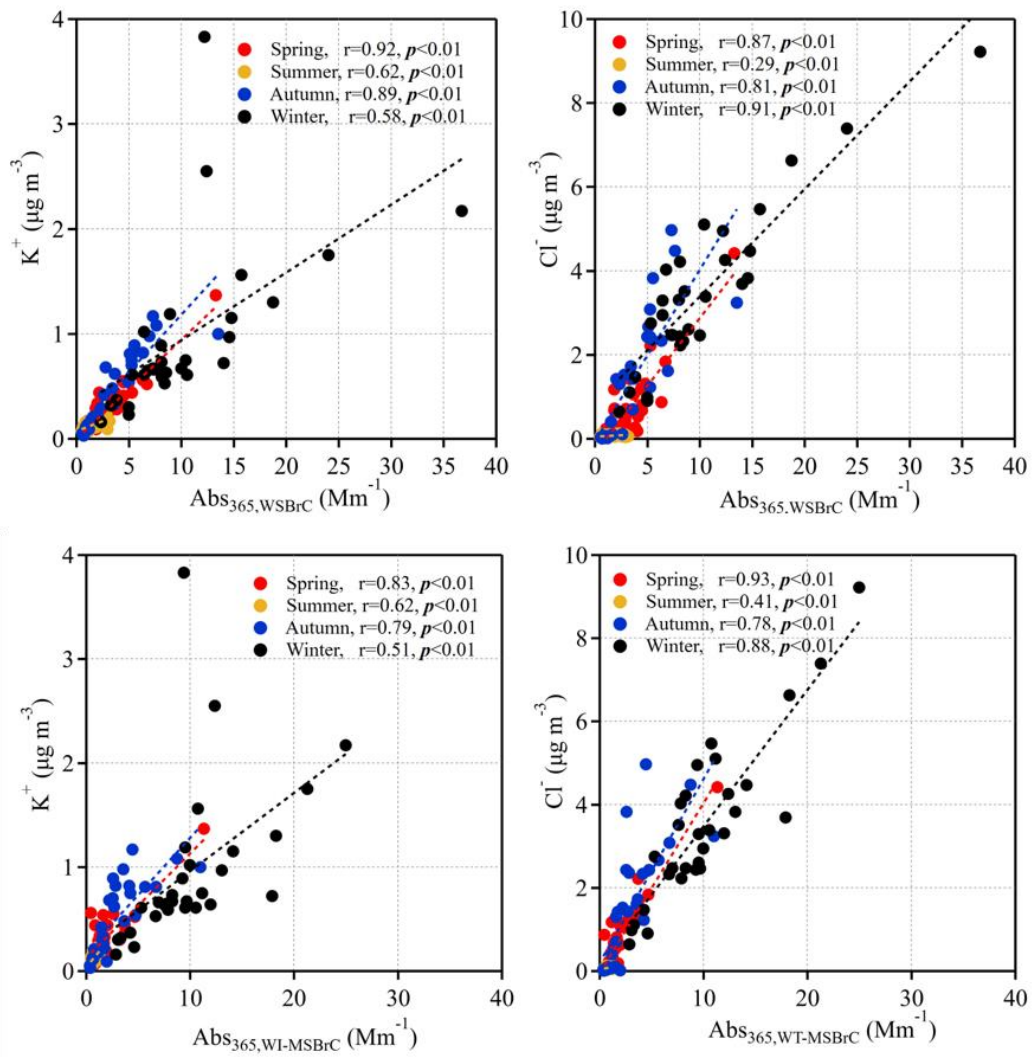

**Figure S2.** Scatter plots of Abs<sub>365</sub>(WSBrC) and Abs<sub>365</sub>(WI-MSBrC) with K<sup>+</sup> and Cl<sup>-</sup> in PM<sub>2.5</sub> from Tianjin in each season during 2018–2019. The concentration of K<sup>+</sup> and Cl<sup>-</sup> from (Dong et al., 2021).

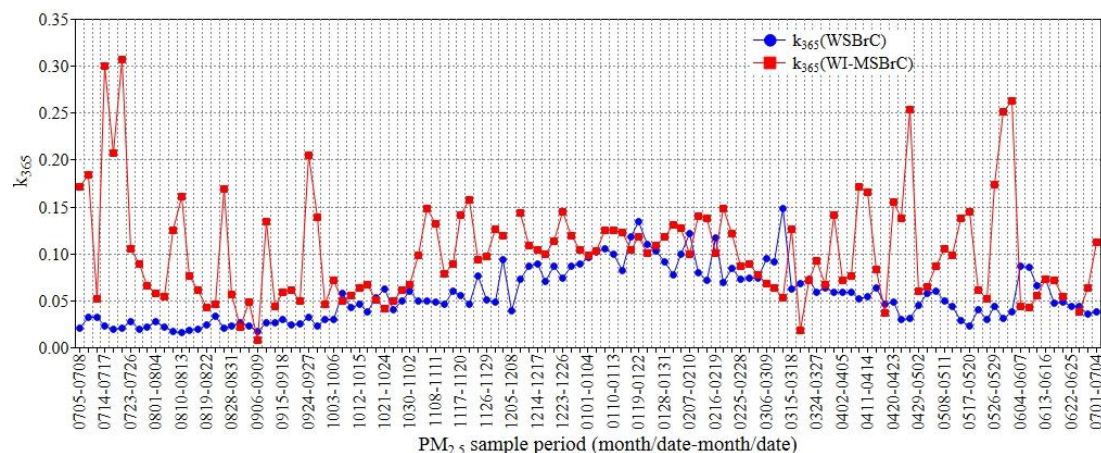

**Figure S3.** Temporal variations in imaginary refractive index ( $k$ ) of WSBBrC and WI-MSBrC in PM<sub>2.5</sub> from Tianjin in each season during 2018–2019.

**Reference:**

Dong, Z. C., Pavuluri, C. M., Xu, Z. J., Wang, Y., Li, P. S., Fu, P. Q., and Liu, C. Q.: Year-round observations of bulk components and <sup>13</sup>C and <sup>15</sup>N isotope ratios of fine aerosols at Tianjin, North China – Data set, <https://doi.org/10.5281/zenodo.5140861>, 2021.
